# Supplementary material for: Rapid hybrid chemical vapor deposition for efficient and hysteresis-free perovskite solar modules with an operation lifetime exceeding 800 hours
Source: Royal Society of Chemistry journal article supplement (doi:10.1039/d0ta09007g), 2020-01-01
Supplement: d0ta09007g1.pdf [file d0ta09007g1.pdf]

## Supporting Information

### **Rapid Hybrid Chemical Vapor Deposition for Efficient and Hysteresis-Free Perovskite Solar Modules with an Operation Lifetime Exceeding 800 Hours**

*Longbin Qiu †, Sisi He †, Zonghao Liu, Luis K. Ono, Dae-Yong Son, Yuqiang Liu, Guoqing  
Tong, Yabing Qi\**

† L. Qiu and S. He contributed equally to this work.

Energy Materials and Surface Sciences Unit (EMSSU), Okinawa Institute of Science and  
Technology Graduate University (OIST), 1919-1 Tancha, Kunigami-gun, Onna-son, Okinawa  
904-0495, Japan.

**\*Corresponding author:** Yabing Qi, E-mail: [Yabing.Qi@OIST.jp](mailto:Yabing.Qi@OIST.jp)

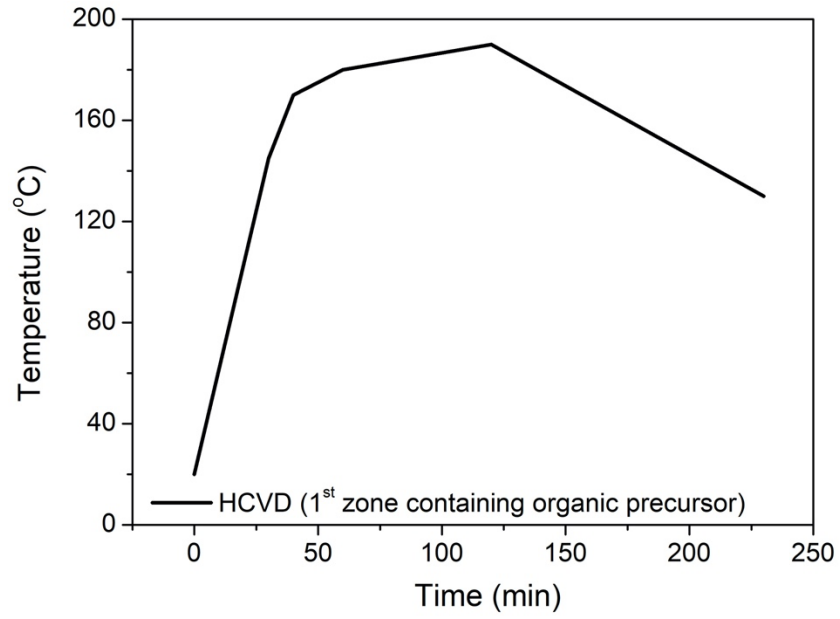

**Figure S1.** Programed temperature profile as a function of time during the regular HCVD process for the heating zone containing the crucible with the organic precursor.

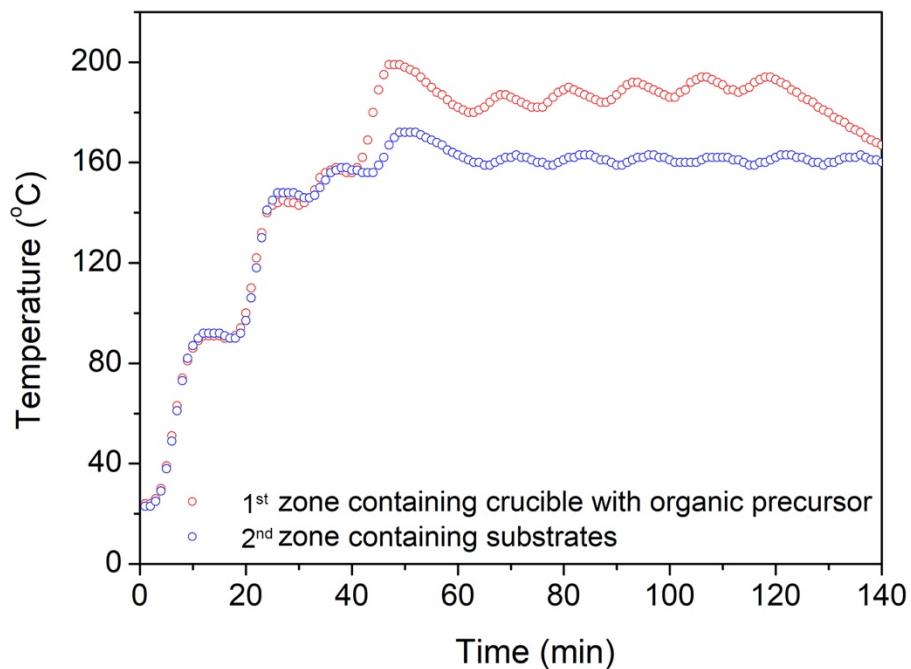

**Figure S2.** The recorded temperature profile for the regular HCVD method during the temperature ramping and deposition process for the 1<sup>st</sup> zone containing the crucible with the organic precursor and 2<sup>nd</sup> zone containing the substrates. Temperature fluctuation is observed during the temperature ramping and deposition processes. A slow ramping rate is used to minimize temperature overshooting with respect to the programmed temperature.

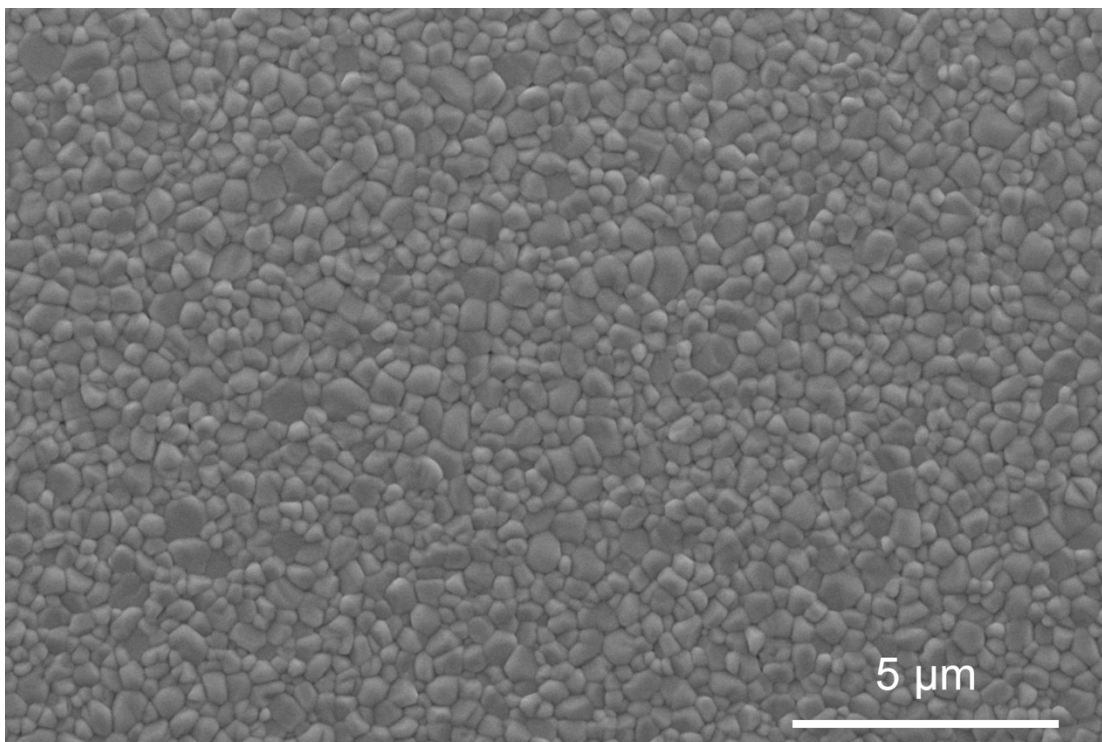

**Figure S3.** SEM micrograph showing the surface morphology of the RHCVD deposited  $\text{Cs}_{0.1}\text{FA}_{0.9}\text{PbI}_3$  perovskite film across a relatively large area ( $20\ \mu\text{m} \times 13\ \mu\text{m}$ ).

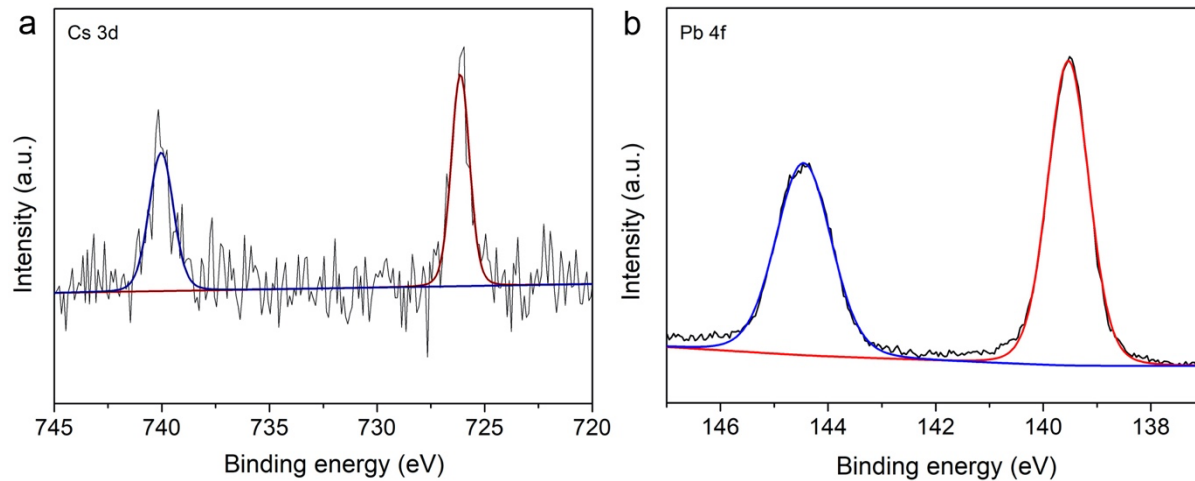

**Figure S4.** High resolution XPS spectra of **a.** Cs 3d and **b.** Pb 4f core levels confirming the incorporation of Cs cations into the perovskite films deposited by RHCVD.

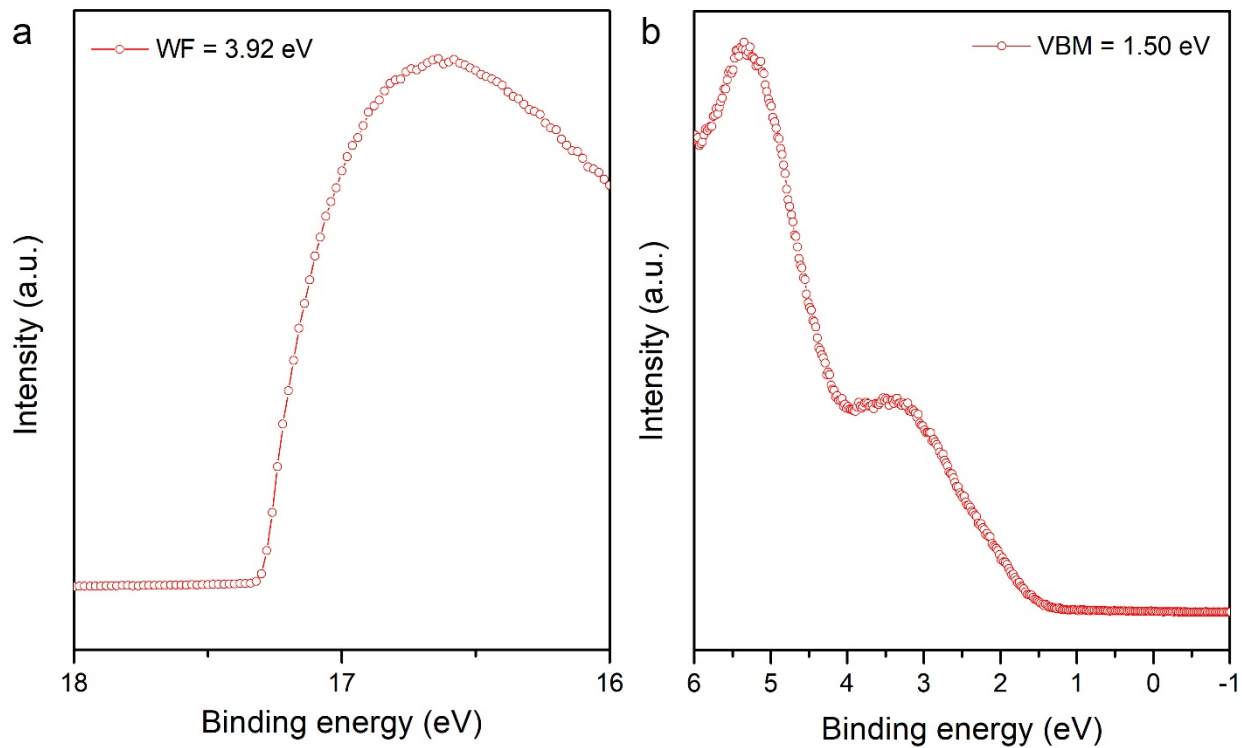

**Figure S5.** UPS spectra of the RHCVD deposited  $\text{Cs}_{0.1}\text{FA}_{0.9}\text{PbI}_3$  perovskite layer. **a.** the work function of the perovskite layer is 3.92 eV. **b.** the valence band maximum for the perovskite layer is 1.50 eV below the Fermi level.

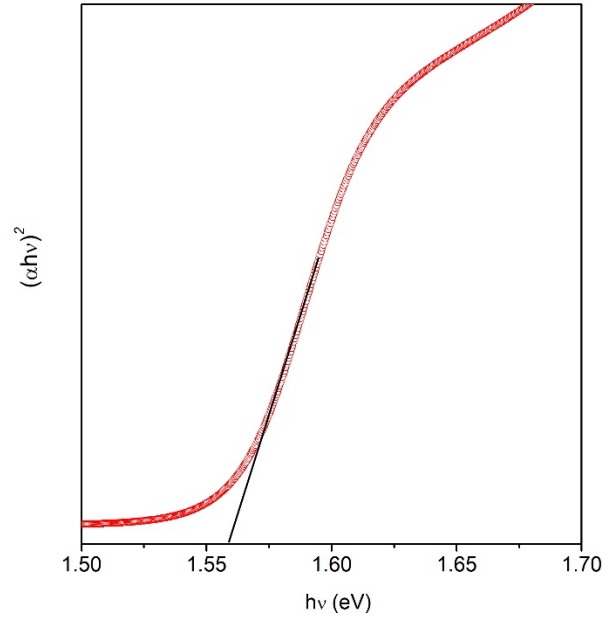

**Figure S6.** The optical band gap of the RHCVD deposited  $\text{Cs}_{0.1}\text{FA}_{0.9}\text{PbI}_3$  perovskite film extracted from Tauc-plot is 1.56 eV.

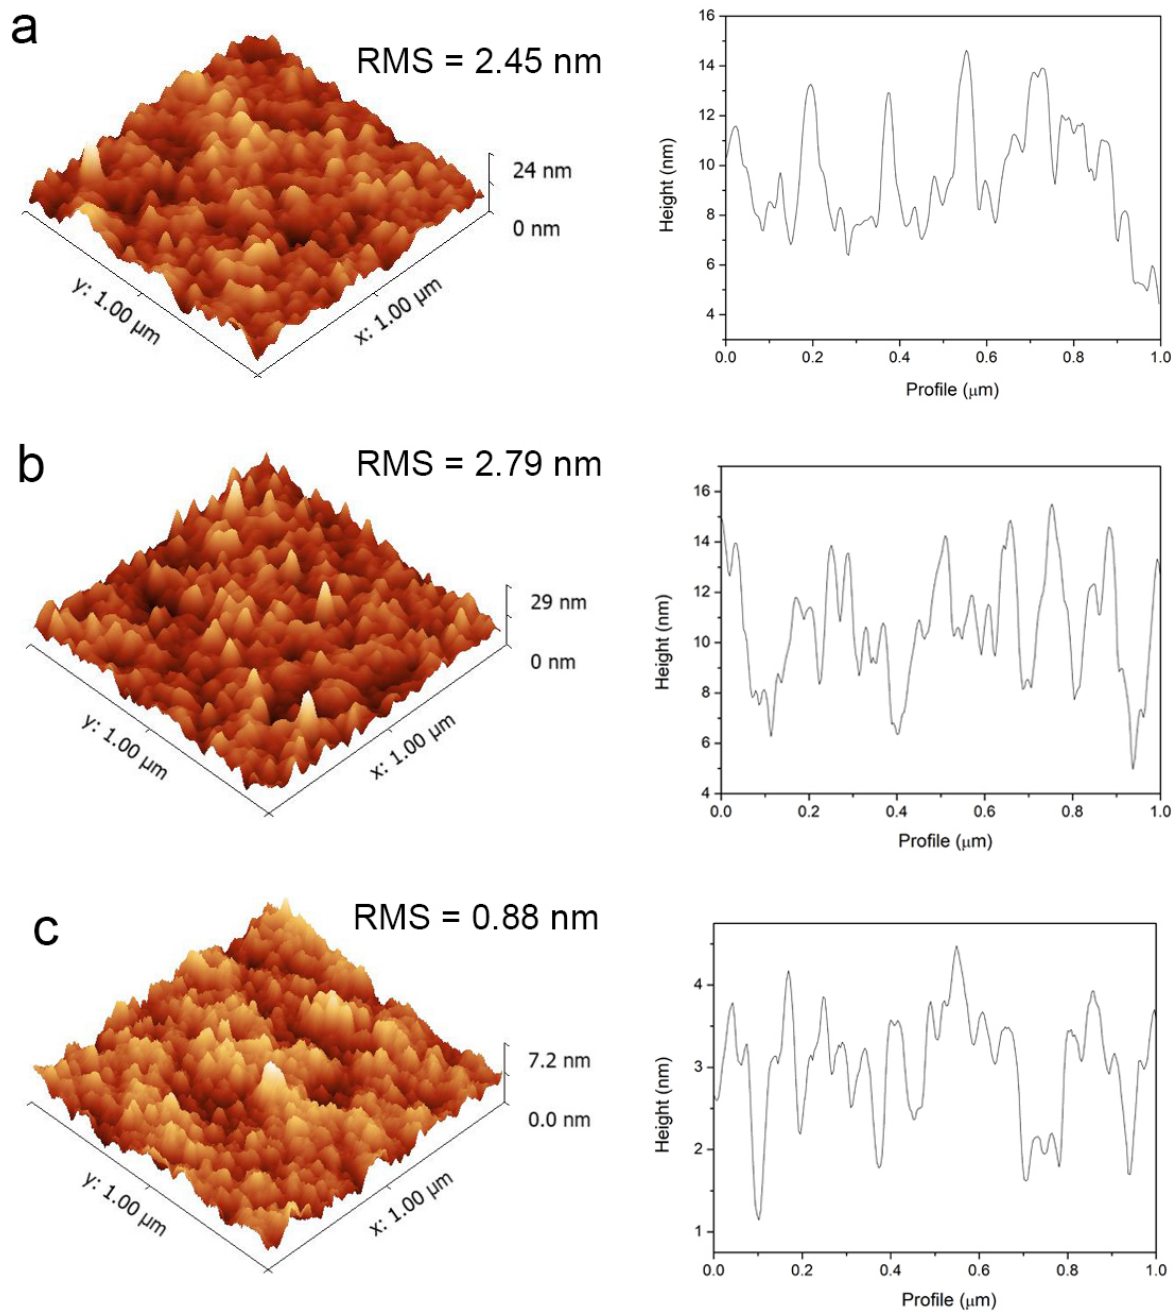

**Figure S7.** Atomic force microscopy images showing the surface morphology of (a) the bare ITO substrate, (b) sputter-deposited  $\text{SnO}_2$  on the ITO substrate, and (c) spin coated  $\text{SnO}_2$  nanocrystal film on the ITO substrate.



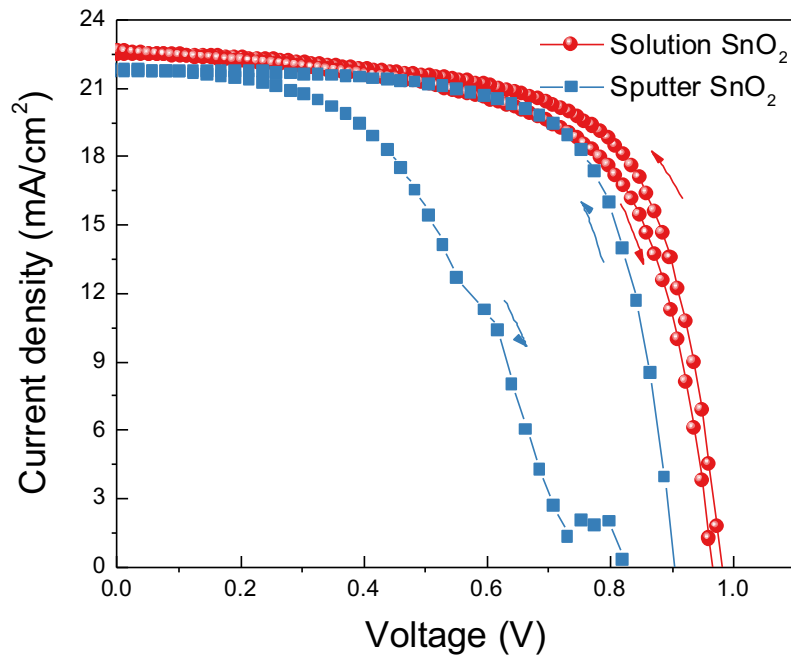

**Figure S8.** Current density-voltage curves of the PSCs based on the RHCVD-grown perovskite films deposited on the solution coated SnO<sub>2</sub> nanocrystal film and the sputter-deposited amorphous SnO<sub>2</sub> film, respectively. The reverse scan and forward scan PCE for the PSC based on the SnO<sub>2</sub> ETL prepared from the SnO<sub>2</sub> nanocrystals solutions are 15.0% and 14.1%, respectively. The reverse scan and forward scan PCE for the perovskite solar cell based on the sputter-deposited SnO<sub>2</sub> ETL are 13.8% and 8.1%, respectively.

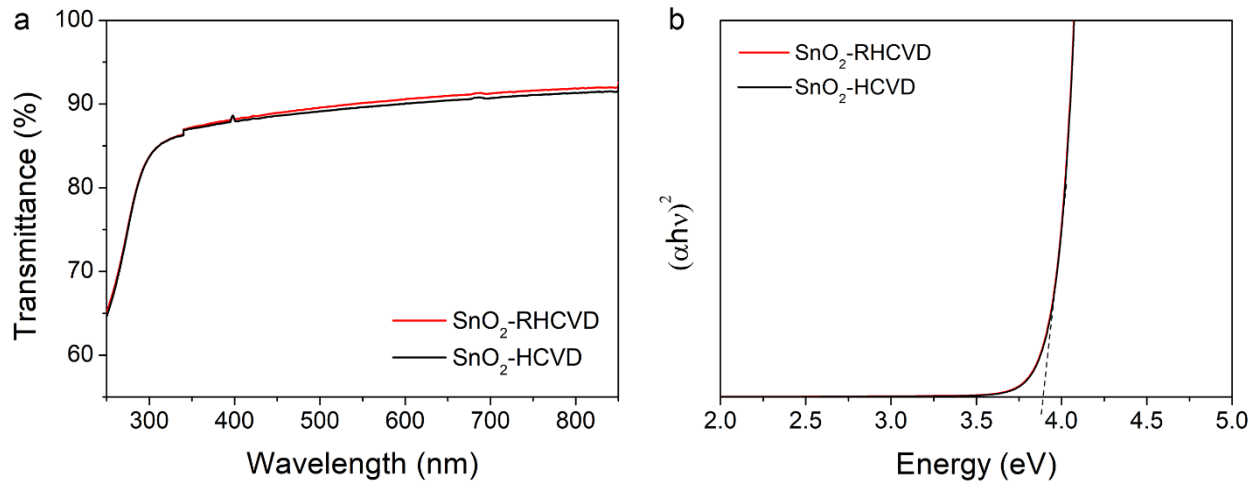

**Figure S9. a)** Transmittance spectra and **b)** Tauc-plot of the SnO<sub>2</sub> films after the RHCVD process and the regular HCVD process. The optical band gap of both films determined on the basis of the Tauc-plot is 3.85 eV.

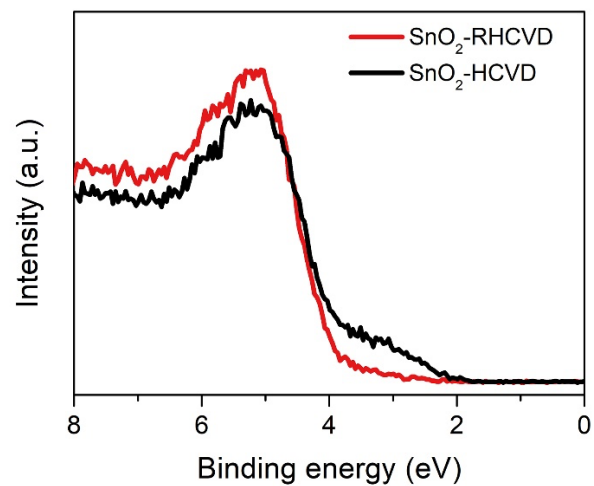

**Figure S10.** High resolution XPS valence features of the SnO<sub>2</sub> films based on the RHCVD process and the regular HCVD process.

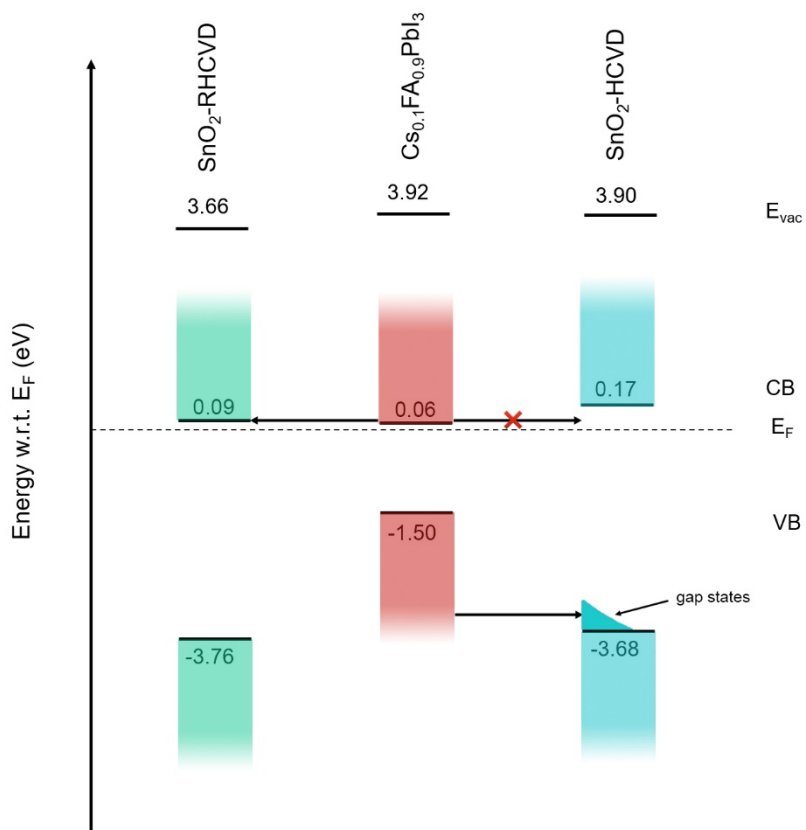

**Figure S11.** Energy level diagram of PSCs based on the vacuum annealed SnO<sub>2</sub> electron transport layer and the RHCVD grown Cs<sub>0.1</sub>FA<sub>0.9</sub>PbI<sub>3</sub> perovskite film.

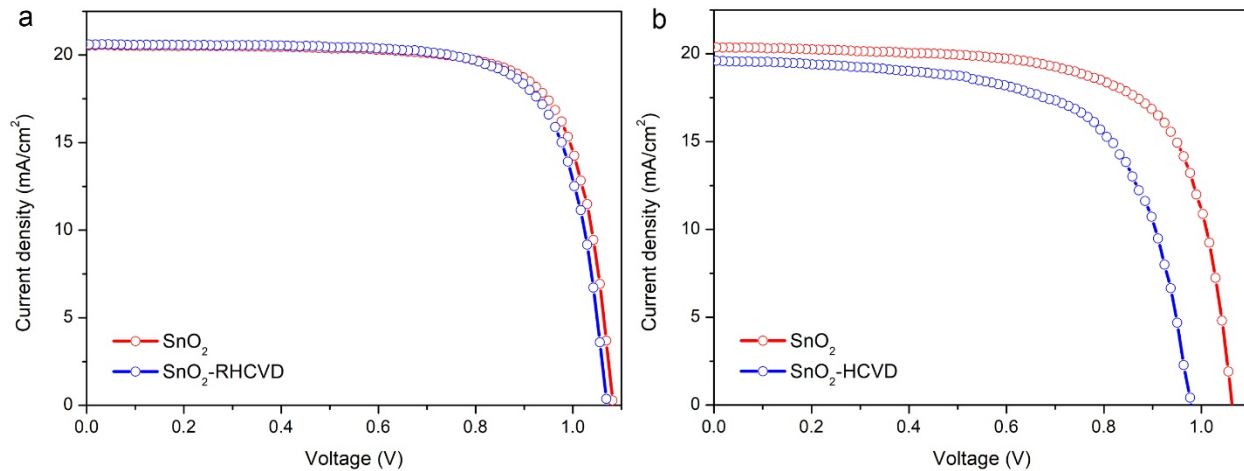

**Figure S12.** PSCs based on the spin coated perovskite layer on the nano-crystal SnO<sub>2</sub> layer **a)** with and without the RHCVD process and **b)** with and without the regular HCVD process.

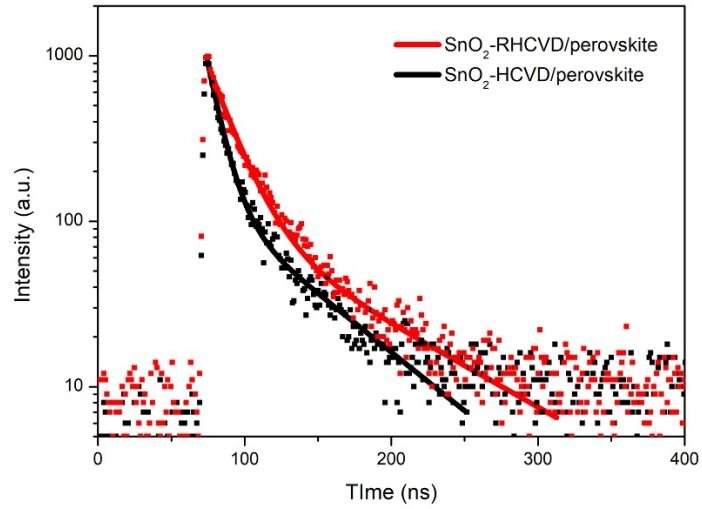

**Figure S13.** Time-resolved photoluminescence (TRPL) spectra of the solution coated CH<sub>3</sub>NH<sub>3</sub>PbI<sub>3</sub> film on the SnO<sub>2</sub> film after treatment of the RHCVD process and the regular HCVD process, respectively.

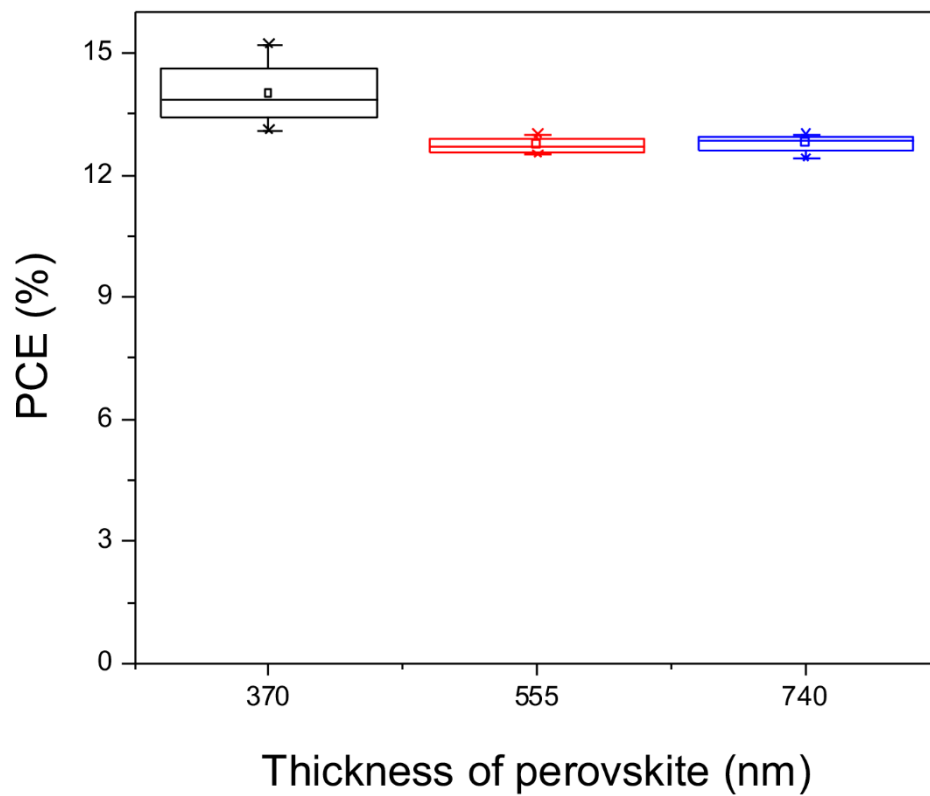

**Figure S14.** PCE as a function of the thickness of the deposited perovskite layer for RHCVD based PSCs.

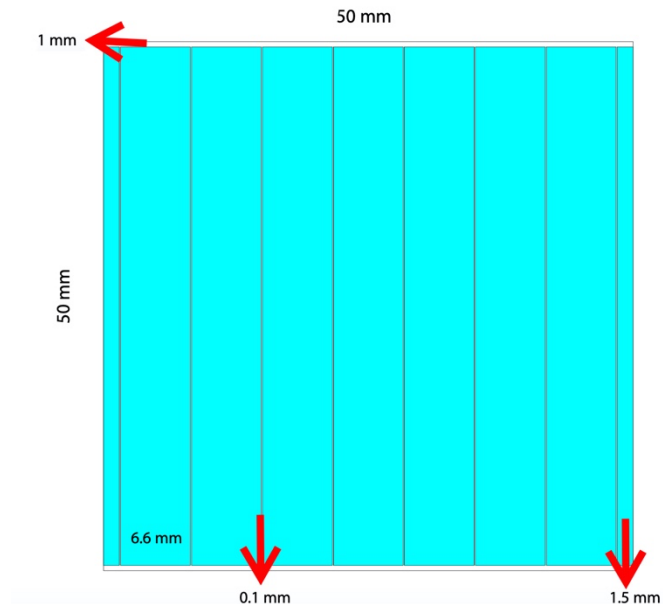

**Figure S15.** The schematic drawing showing the 5 cm × 5 cm substrate design for the PSM fabrication.



**Table S1.** The difference of  $J_{sc}$  values between the J-V curves and EQE curves.

| Process | $J_{sc, J-V}$ (mA/cm <sup>2</sup> ) | $J_{sc, EQE}$ (mA/cm <sup>2</sup> ) | Difference (%) |
|---------|-------------------------------------|-------------------------------------|----------------|
| RHCVD   | 22.3                                | 21.2                                | 4.93           |
| HCVD    | 18.8                                | 18.0                                | 4.26           |

The difference is calculated as  $1 - (J_{sc, EQE}/J_{sc, J-V})$

**Table S2.** TRPL results for  $\text{CH}_3\text{NH}_3\text{PbI}_3$  on the  $\text{SnO}_2$  films after the RHCVD process and the regular HCVD process.

| Electron transport layer | $\tau_1$ (ns) | $\tau_2$ (ns) |
|--------------------------|---------------|---------------|
| $\text{SnO}_2$ -RHCVD    | 17.8          | 87.9          |
| $\text{SnO}_2$ -HCVD     | 10.9          | 73.4          |

**Table S3.** Summary and comparison of the PSCs and PSMs fabricated by the typical solution coating process, regular HCVD as well as RHCVD. For the module area, <sup>aa</sup> means active area, and <sup>da</sup> means designated area. The hysteresis is defined as: HI = hysteresis index =  $(PCE_{\text{reverse}} - PCE_{\text{forward}})/PCE_{\text{reverse}}$ .

| Perovskite                                                                                                                             | Coating method   | Cell PCE (%) | hysteresis | Processing time (h) | Module (cm <sup>2</sup> ) | Module PCE (%) | Stability (h) | Ref       |
|----------------------------------------------------------------------------------------------------------------------------------------|------------------|--------------|------------|---------------------|---------------------------|----------------|---------------|-----------|
| (FAPbI <sub>3</sub> ) <sub>0.95</sub> (MAPbBr <sub>3</sub> ) <sub>0.05</sub>                                                           | Spin coating     | 23.3         | 0.099      | 0.17                | 24.97 <sup>da</sup>       | 17.1           | >1370         | S1        |
| MAPbI <sub>3</sub>                                                                                                                     | Doctor blading   | 21.3         | 0.006      | ~ 0.3               | 63.7 <sup>da</sup>        | 16.4           | N/A           | S2        |
| MAPbI <sub>3-x</sub> Cl <sub>x</sub>                                                                                                   | Slot-die coating | 16.8         | N/A        | 0.25                | 151.9 <sup>aa</sup>       | 10.6           | N/A           | S3        |
| (HOOC(CH <sub>2</sub> ) <sub>4</sub> NH <sub>3</sub> ) <sub>2</sub> PbI <sub>4</sub> /CH <sub>3</sub> NH <sub>3</sub> PbI <sub>3</sub> | Screen printing  | 11.9         | 0.12       | 1                   | 46.7 <sup>aa</sup>        | 10.1           | >10000        | S4        |
| MAPbI <sub>3</sub>                                                                                                                     | HCVD             | 14.99        | N/A        | 2                   | 8.4 <sup>aa</sup>         | 6.22           | N/A           | S5-6      |
| FAPbI <sub>3</sub>                                                                                                                     | HCVD             | 12.5         | N/A        | 1                   | NA                        | 7.7            | N/A           | S7        |
| MAPbI <sub>3</sub>                                                                                                                     | HCVD             | 15.6         | N/A        | 1                   | 8.8 <sup>aa</sup>         | 9.5            | N/A           | S8        |
| Cs <sub>x</sub> FA <sub>1-x</sub> PbI <sub>3-y</sub> Br <sub>y</sub>                                                                   | HCVD             | 17.29        | 0.05       | > 0.5               | 41.25 <sup>aa</sup>       | 12.24          | 200           | S9        |
| Cs <sub>0.07</sub> FA <sub>0.93</sub> PbI <sub>3</sub>                                                                                 | HCVD             | 16.6         | 0.13       | 3.5                 | 12 <sup>aa</sup>          | 14.6           | N/A           | S10       |
| Cs <sub>0.1</sub> FA <sub>0.9</sub> PbI <sub>2.9</sub> Br <sub>0.1</sub>                                                               | HCVD             | 13.3         | 0.16       | 3.5                 | 91.8 <sup>da</sup>        | 9.34           | 500           | S11       |
| FAPbI <sub>3</sub> Br                                                                                                                  | HCVD             | 15.6         | 0.08       | 3.5                 | 12 <sup>aa</sup>          | 14.7           | 388           | S12       |
| Cs <sub>0.1</sub> FA <sub>0.9</sub> PbI <sub>3</sub>                                                                                   | RHCVD            | 15.5         | 0.09       | ~ 0.2               | 22.4 <sup>da</sup>        | 12.3           | > 800         | This work |

## References:

[S1] E. H. Jung, N. J. Jeon, E. Y. Park, C. S. Moon, T. J. Shin, T. Y. Yang, J. H. Noh & J. Seo. Nature 2019, 567, 511-515.

- [S2] Y. Deng, C. H. Van Brackle, X. Dai, J. Zhao, B. Chen & J. Huang. *Sci. Adv.* 2019, 5, eaax7537.
- [S3] F. Di Giacomo, S. Shanmugam, H. Fledderus, B. J. Bruijnaers, W. J. H. Verhees, M. S. Dorenkamper, S. C. Veenstra, W. Qiu, R. Gehlhaar, T. Merckx, T. Aernouts, R. Andriessen & Y. Galagan. *Solar Energy Materials and Solar Cells* 2018, 181, 53-59.
- [S4] G. Grancini, C. Roldan-Carmona, I. Zimmermann, E. Mosconi, X. Lee, D. Martineau, S. Narbey, F. Oswald, F. De Angelis, M. Graetzel & M. K. Nazeeruddin. *Nat. Commun.* 2017, 8, 15684.
- [S5] P.-S. Shen, J.-S. Chen, Y.-H. Chiang, M.-H. Li, T.-F. Guo, P. Chen, *Adv. Mater. Interfaces* 2016, 3, 1500849.
- [S6] M. Li, P. Shen, J. Chen, Y. Chiang, P. Chen, T. Guo, in *2016 23rd International Workshop on Active-Matrix Flatpanel Displays and Devices (AM-FPD)*, **2016**, pp. 256-257.
- [S7] M. R. Leyden, M. V. Lee, S. R. Raga, Y. B. Qi, *J. Mater. Chem. A* 2015, 3, 16097-16103.
- [S8] M. R. Leyden, Y. Jiang, Y. B. Qi, *J. Mater. Chem. A* 2016, 4, 13125-13132.
- [S9] L. Luo, Y. Zhang, N. Chai, X. Deng, J. Zhong, F. Huang, Y. Peng, Z. Ku, Y.-B. Cheng, *J. Mater. Chem. A* 2018, 6, 21143-21148.
- [S10] Y. Jiang, M. R. Leyden, L. Qiu, S. Wang, L. K. Ono, Z. Wu, E. J. Juarez-Perez, Y. B. Qi, *Adv. Funct. Mater.* 2018, 28, 1703835.
- [S11] L. Qiu, S. He, Y. Jiang, D.-Y. Son, L. K. Ono, Z. Liu, T. Kim, T. Bouloumis, S. Kazaoui, Y. B. Qi, *J. Mater. Chem. A* 2019, 7, 6920-6929.
- [S12] Y. Jiang, M. Remeika, Z. Hu, E. J. Juarez-Perez, L. Qiu, Z. Liu, T. Kim, L. K. Ono, D.-Y. Son, Z. Hawash, M. R. Leyden, Z. Wu, L. Meng, J. Hu, Y. B. Qi, *Adv. Energy Mater.* 2019, 9, 1803047.
